# Supplementary material
Source: Springer Nature journal article supplement (https://www.springermedizin.de/resource/supplementary/12913_2014_3111_MOESM3_ESM.pdf/9532464)

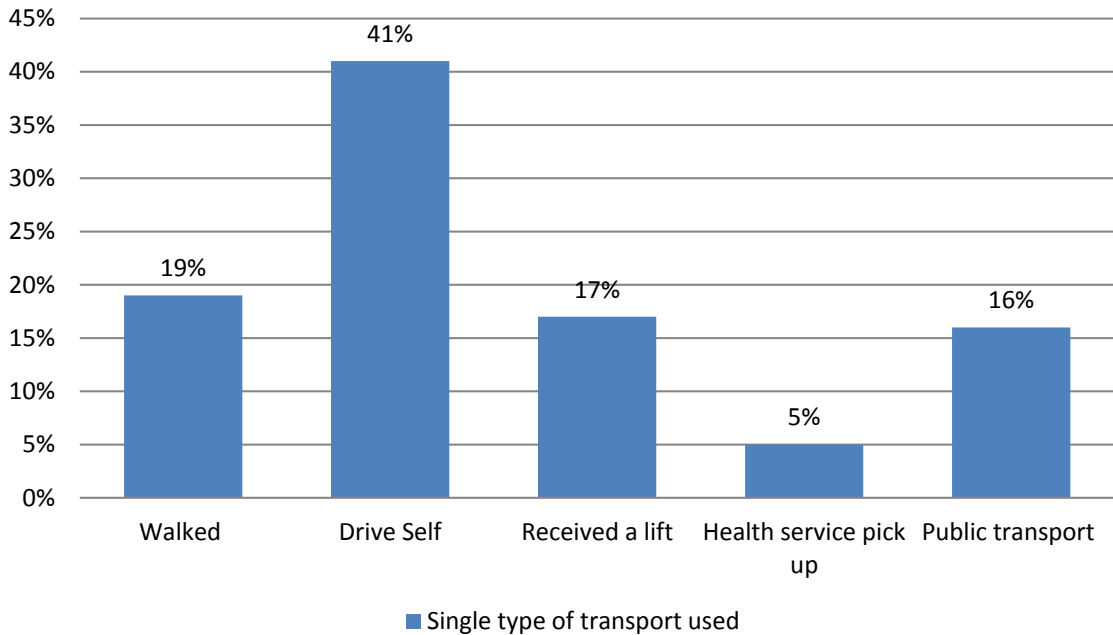

Supplement: MOESM3 [file 9532464]
